# Supplementary material
Source: MDPI journal article supplement (https://www.mdpi.com/2076-3417/12/13/6577)
Supplement: s1 [file s1]

# Physicochemical and Morphological Study of the *Saccharomyces cerevisiae* Cell-Based Microcapsules with Novel Cold-Pressed Oil Blends

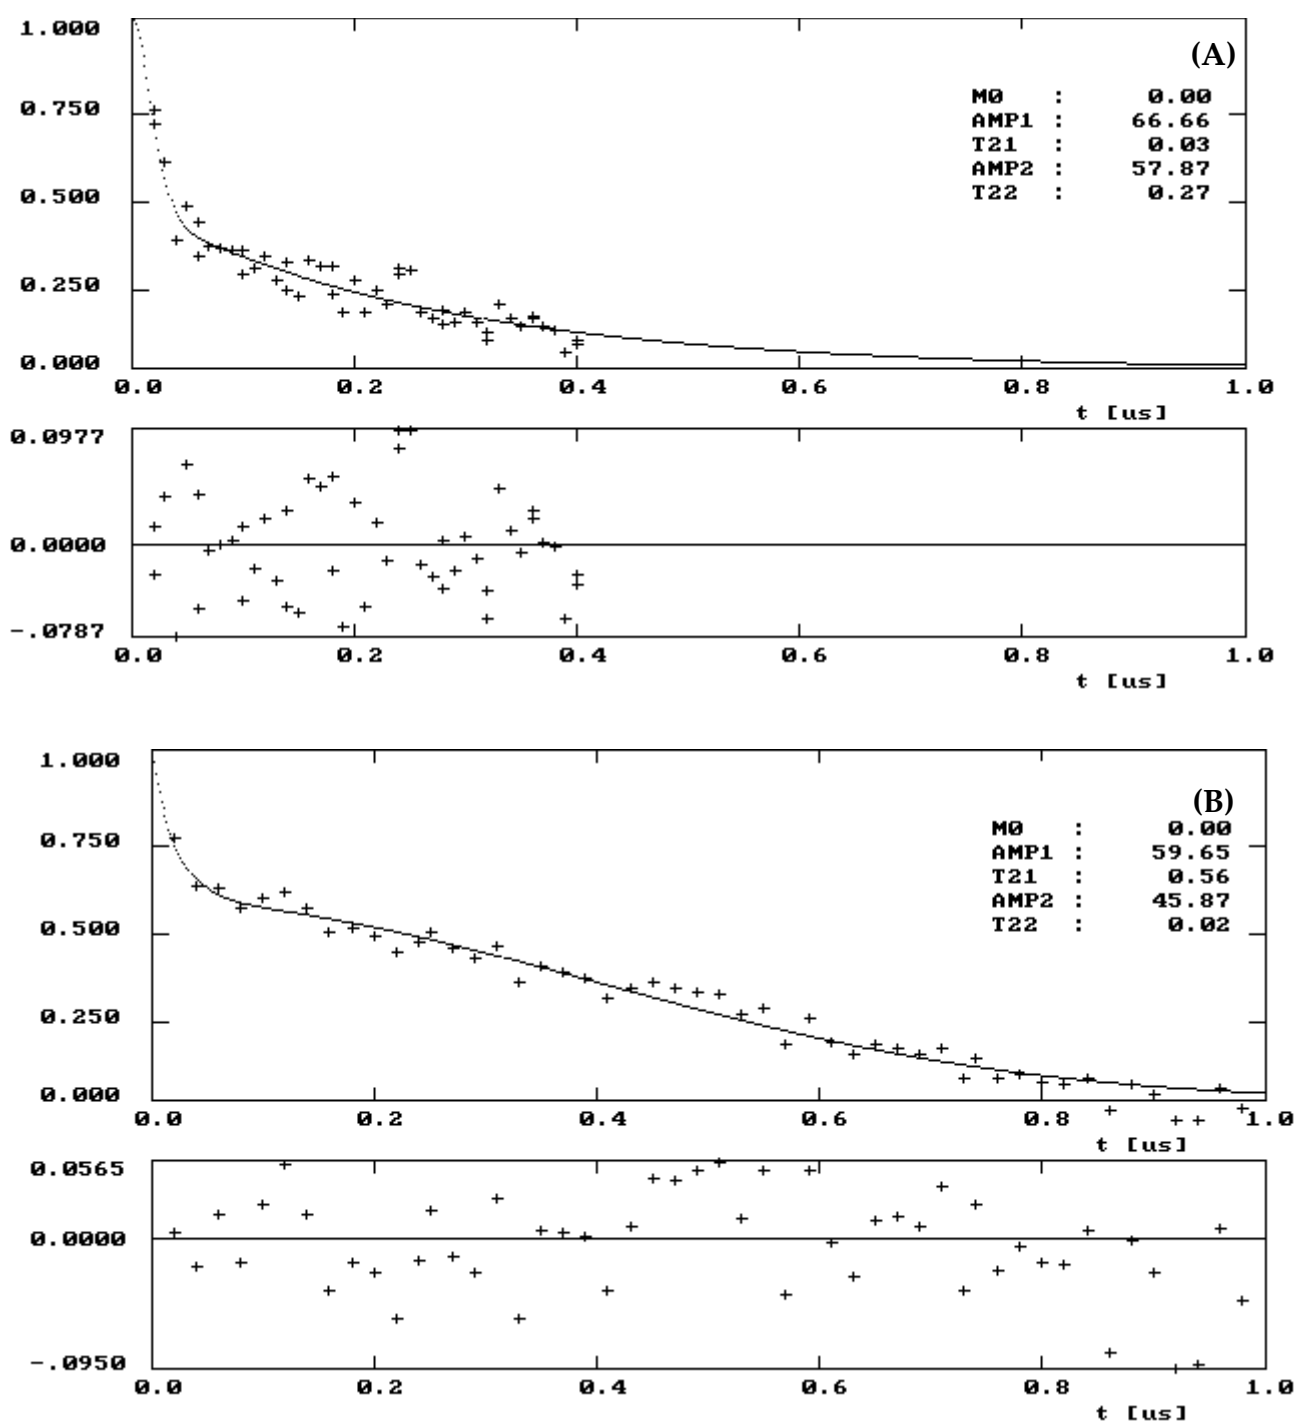

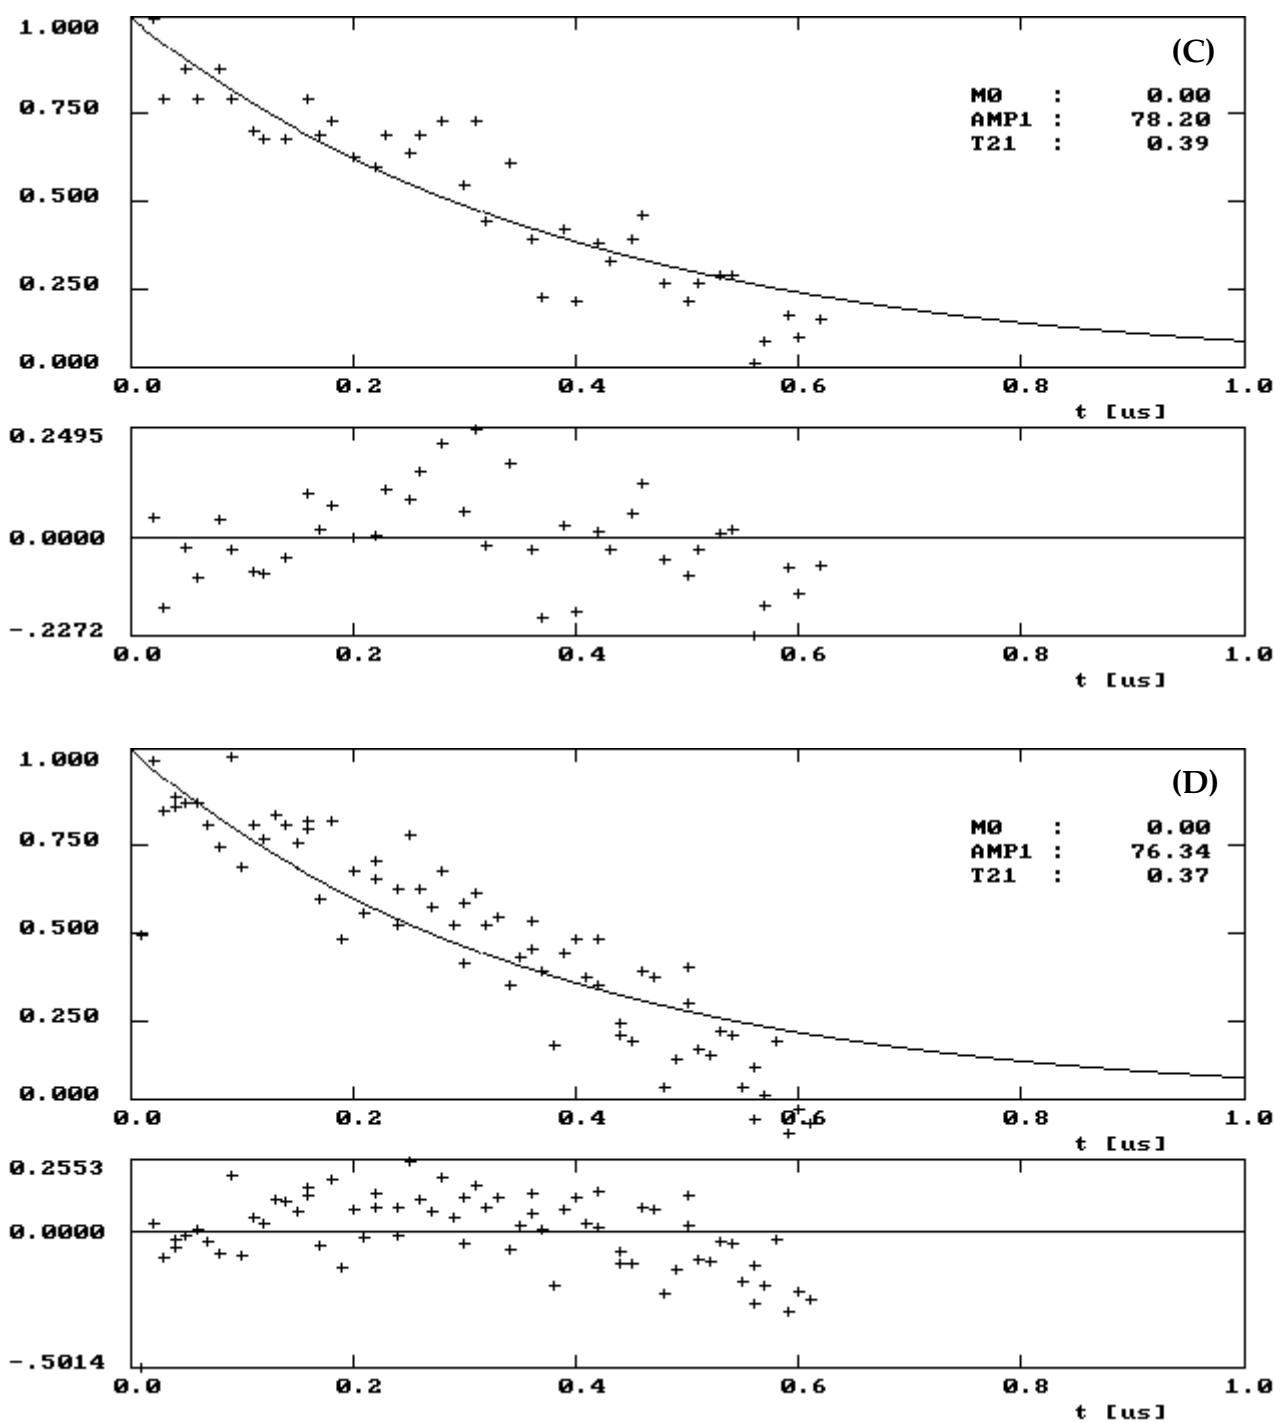

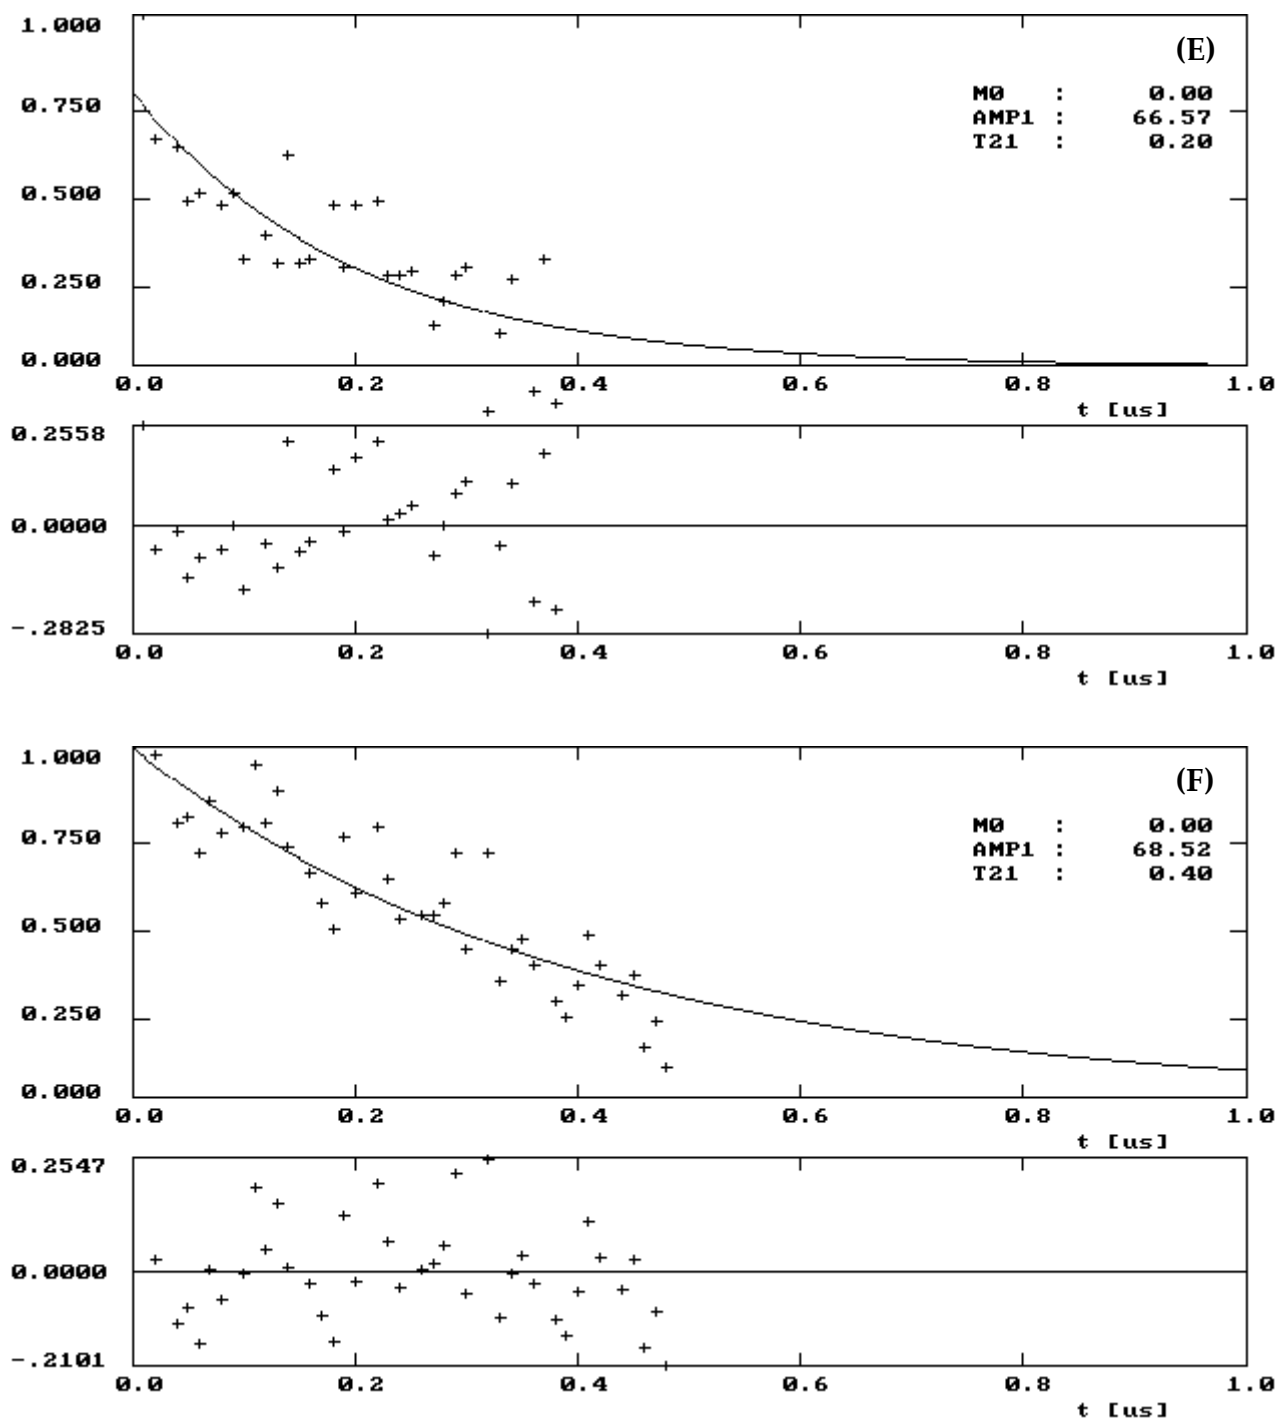

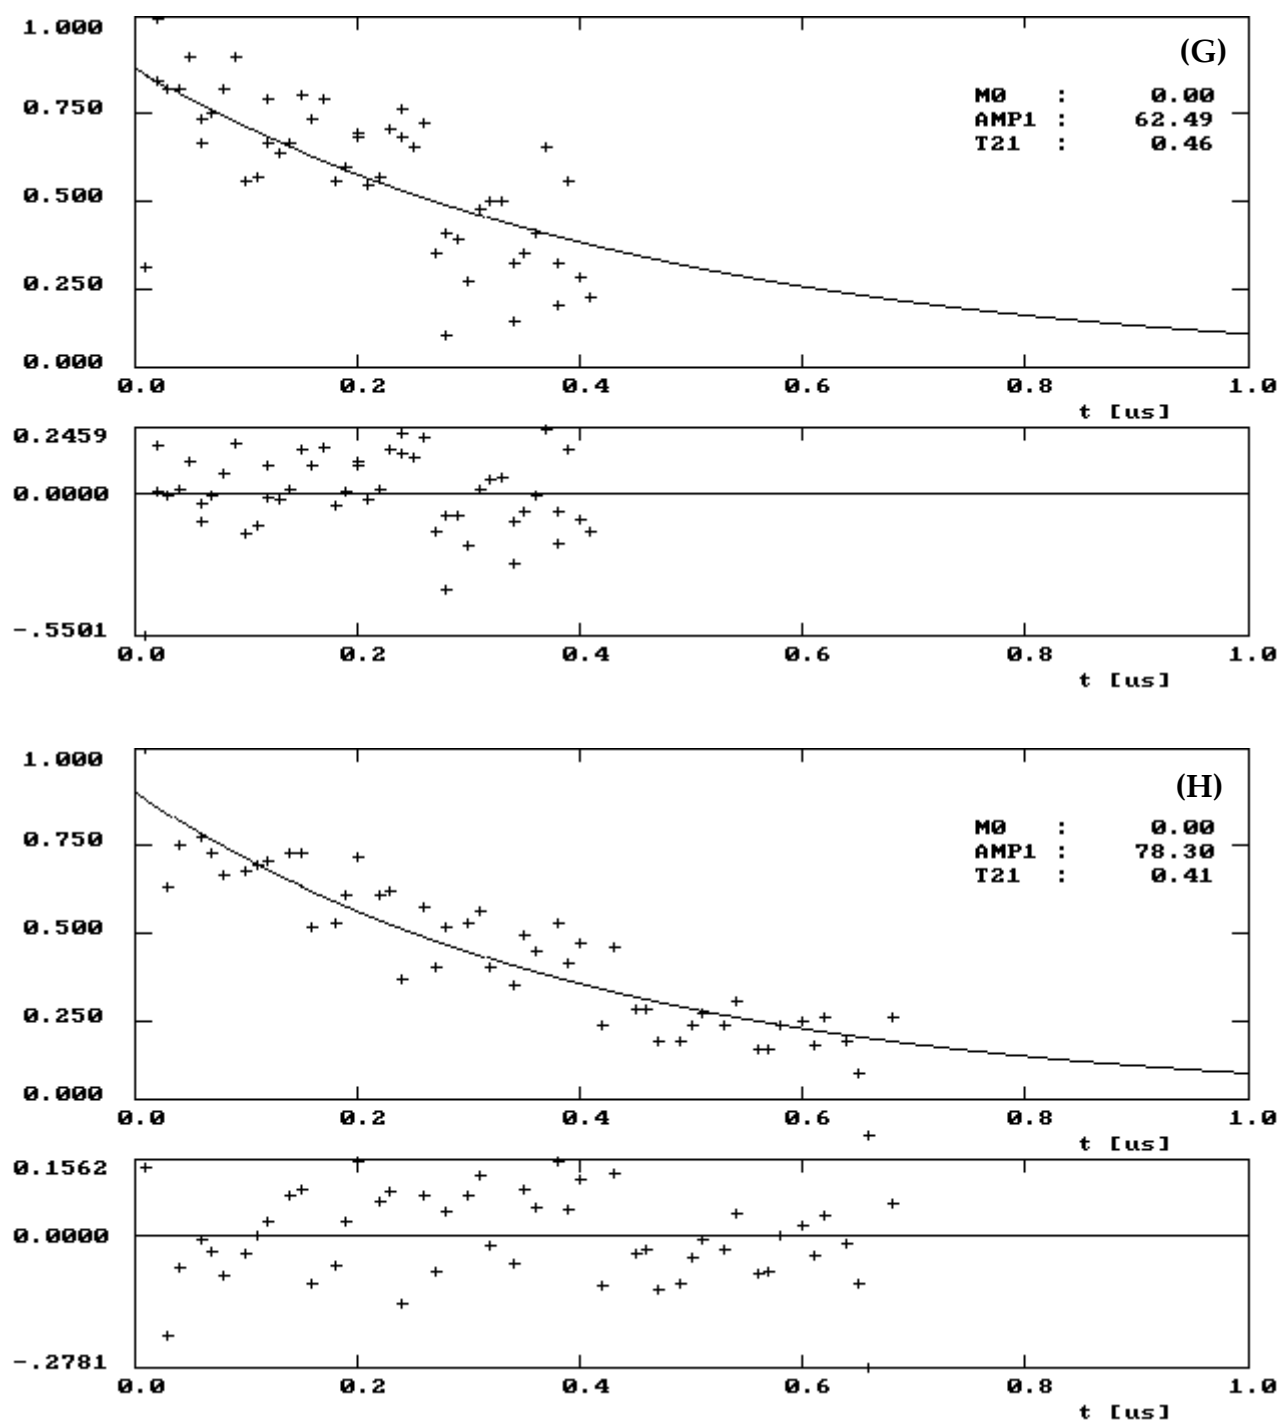

**Figure S1.** Free induction decays (FIDs) of NY (A), AY (B), RBWg/NY (C), RBWg/AY (D), CRb/NY (E), CRb/AY (F), REp/NY (G) and REp/AY (H).
